# Supplementary material for: Limitations of mouse models for sickle cell disease conferred by their human globin transgene configurations
Source: PubMed Central journal article supplement (PMC9277148; doi:10.1242/dmm.049463), 2022-07-07
Supplement: dmm-15-049463-s1.pdf [file dmm-15-049463-s1.pdf]

**A**

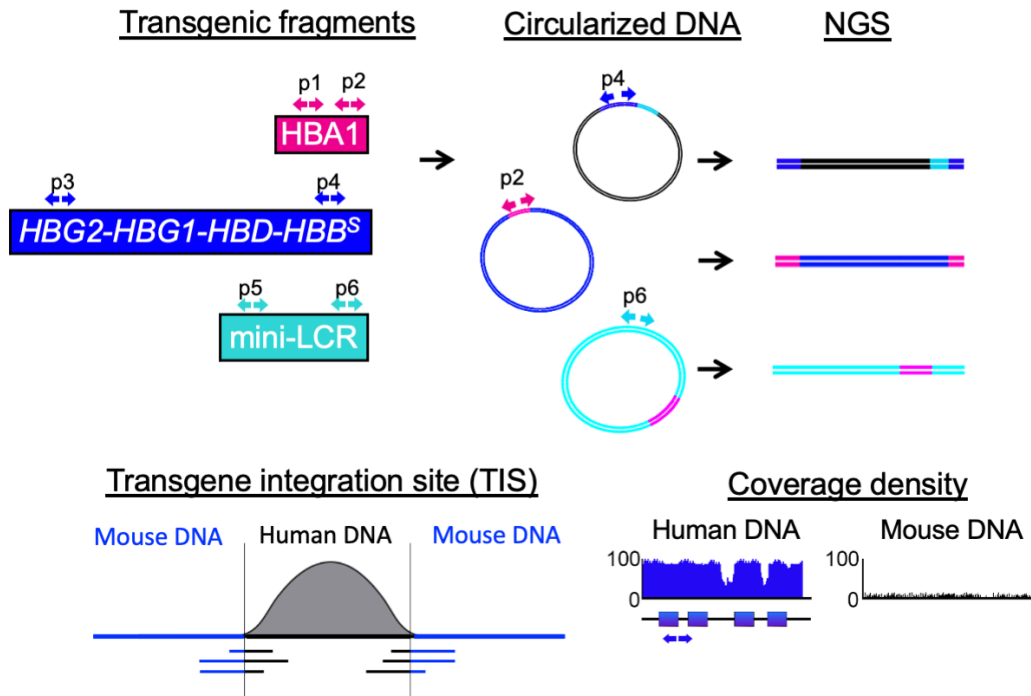

**B**

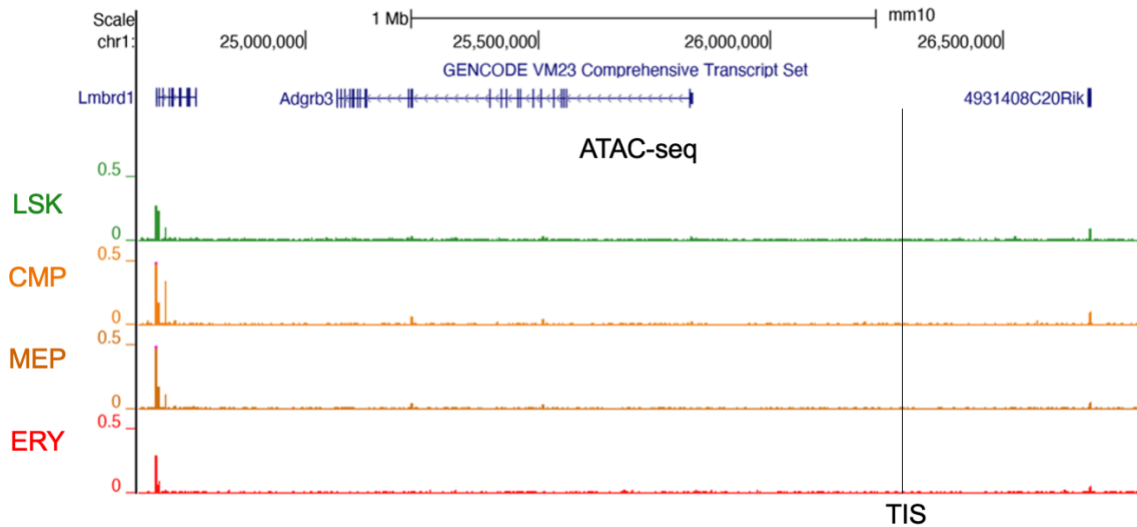

**Fig. S1 (related to Figure 1). Analysis of the Berkeley mouse transgene. A)** Target locus amplification (TLA) sequencing to detect the 3 Berkeley human transgenes and mouse DNA junctions. The TLA protocol to generate DNA circles containing genomic sequences in physical proximity within cells is described in Methods. Two outward-facing primer sets, designated p1-p6, were used to selectively amplify DNA from each transgene within the DNA circles, then sequenced by NGS. The transgene integration site (TIS) was determined by identifying DNA sequence reads that align to the human and mouse genomes. We identified multiple DNA fusion reads linking different transgenic fragments to each other or to mouse DNA at a single TIS. Coverage density was determined by aligning NGS reads to mouse or human genomes. **B)** ATAC-seq data from the BX VISION Browser showing nuclease accessible regions near the TIS in mouse hematopoietic cell lineages.

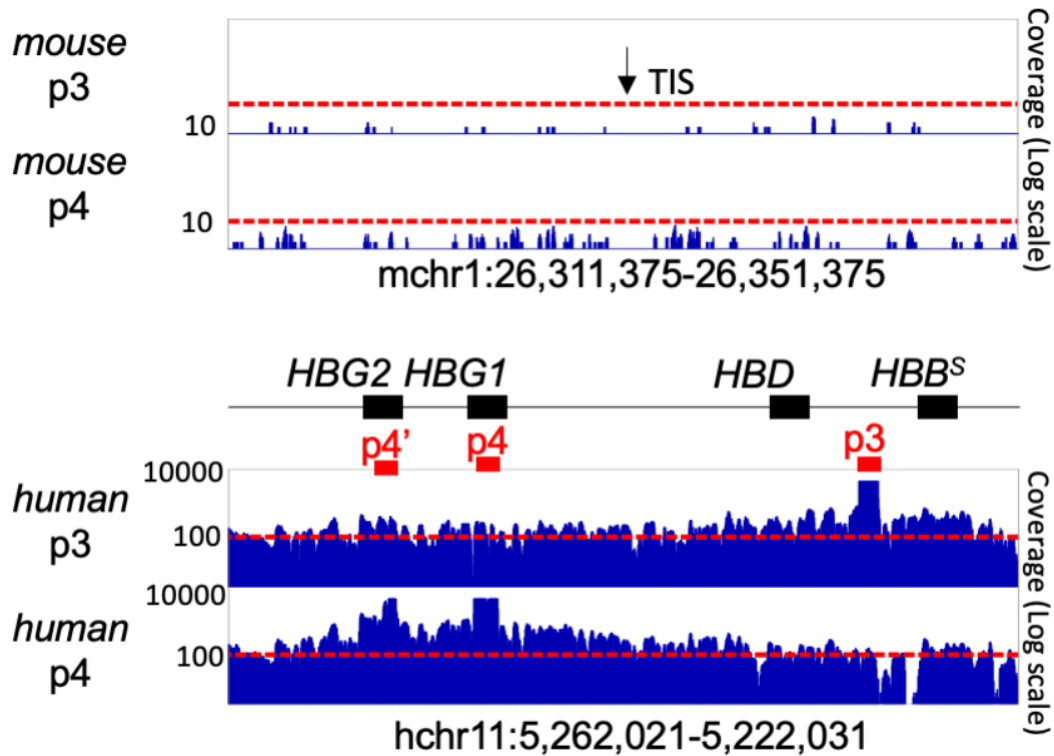

**Fig. S2 (related to Figure 1). Sequence coverage (log scale) of NGS data derived from TLA primer sets 3 and 4 (Figure S1 and Table S1) aligned to the mouse and human genomes. Red dotted line indicates median coverage across region. The TIS is indicated by a black arrow in the mouse genome. Regions amplified by each primer set are indicated by red rectangles, p4' is an additional binding site for p4 based on sequence identity within the duplicated *HBG2* and *HBG1* genes.**

### Townes mouse

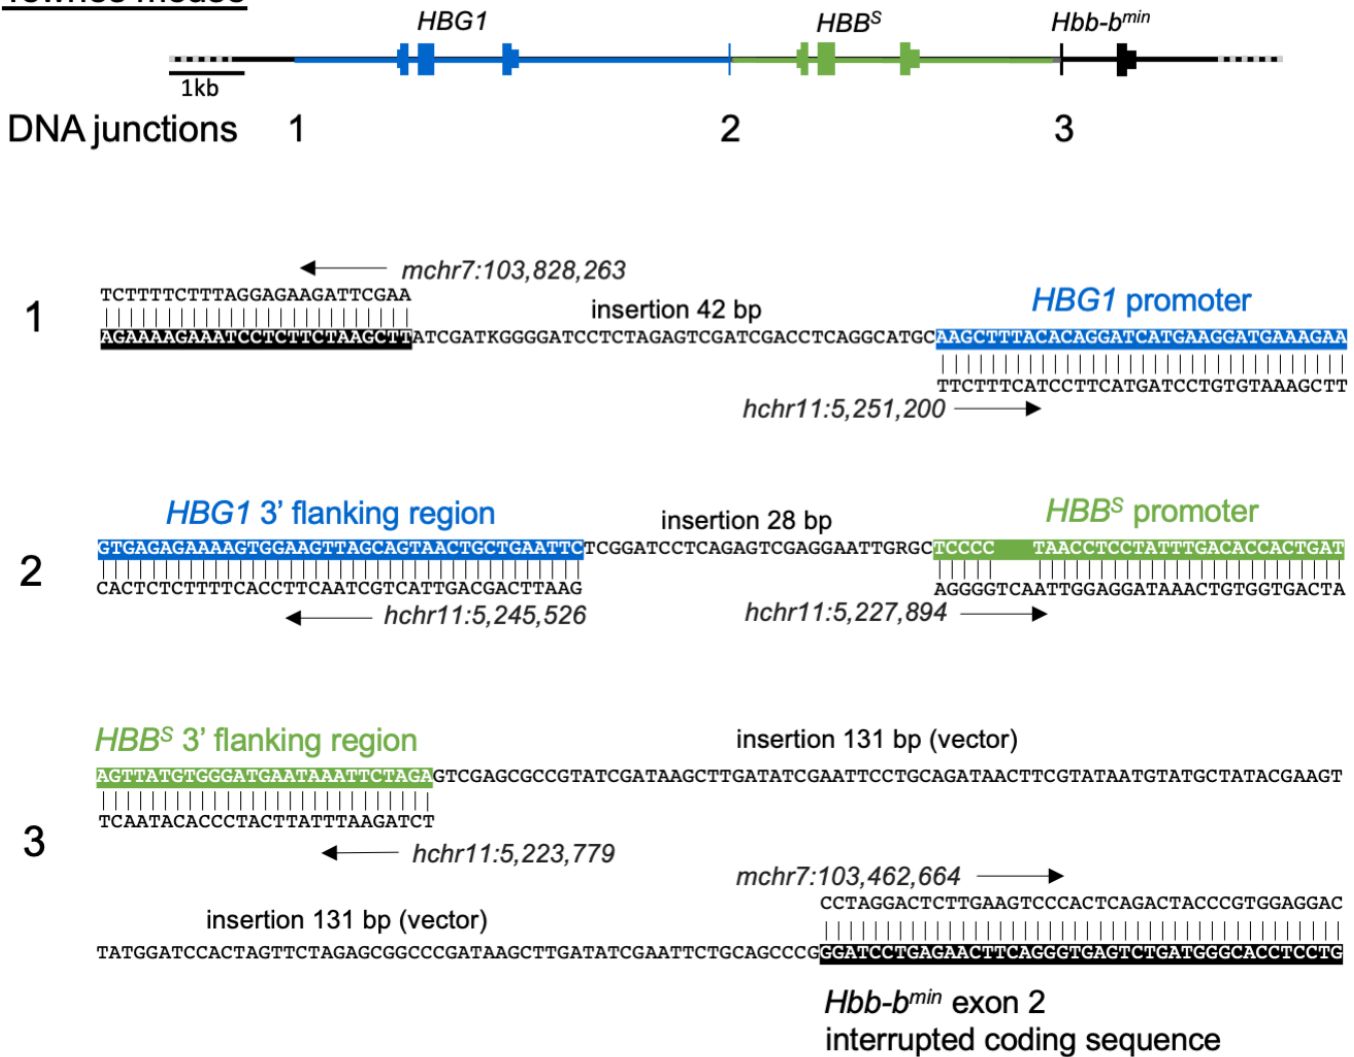

**Fig. S3 (related to Figure 2). The mouse-human and human-human DNA junctions in the Townes strain.** The diagram on top shows a map of the human *HBG1* (blue) and *HBB* (green) genes embedded in the mouse  $\beta$ -like globin locus (black). Three DNA fusions are indicated in the diagram, with the corresponding sequences aligned to consensus mouse or human genomic sequences shown below. The genome coordinates located at each breakpoint are indicated.

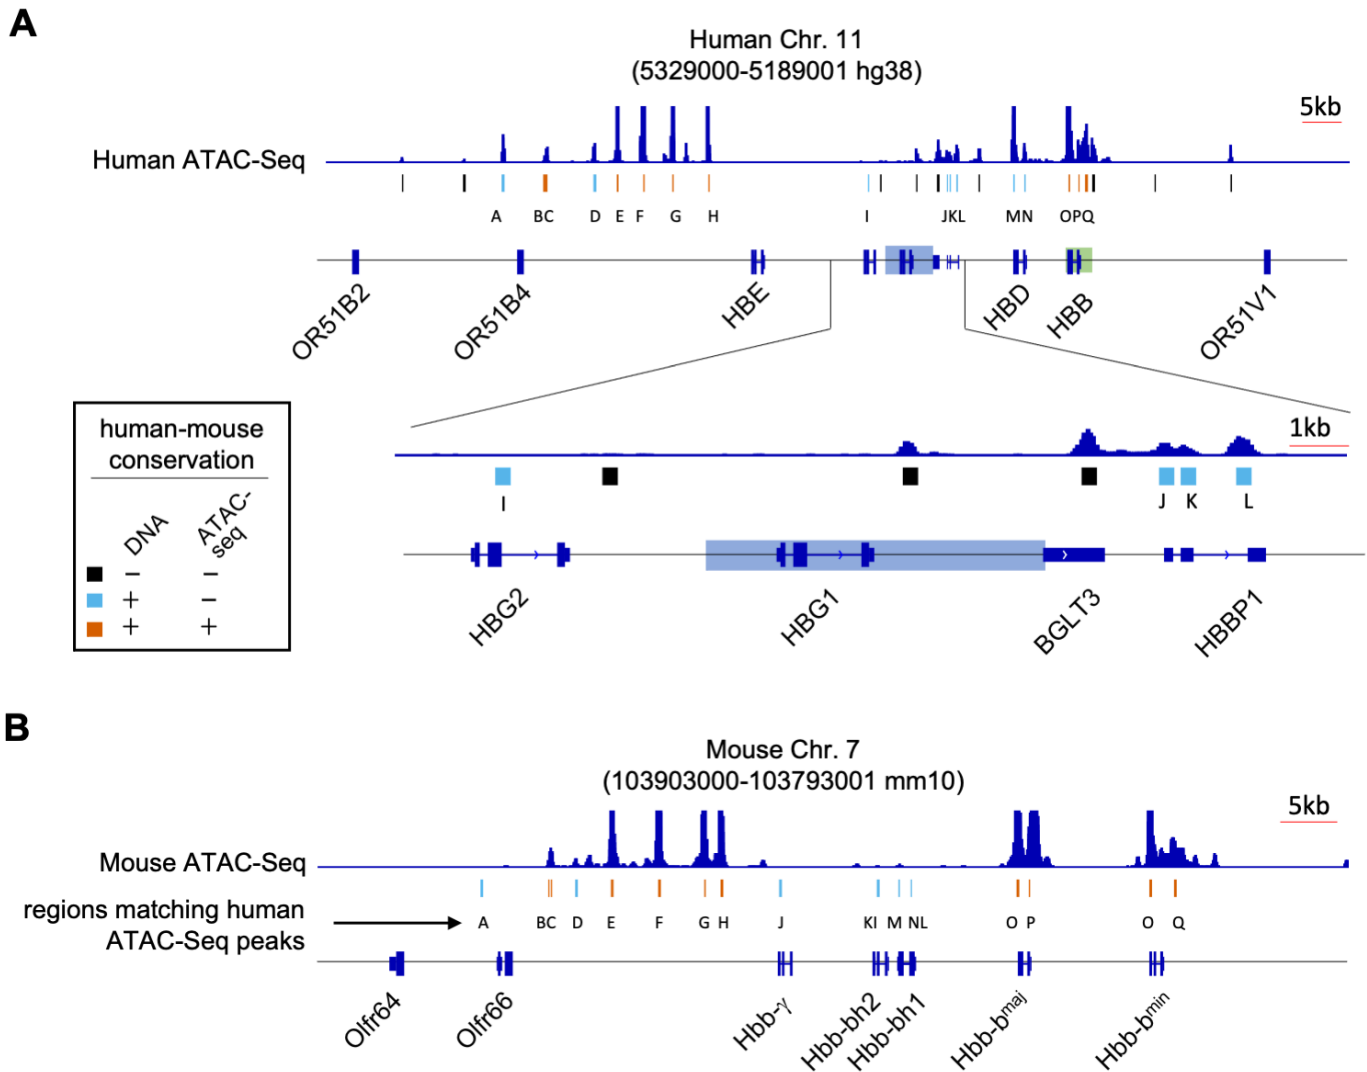

**Fig. S4 (related to Figure 2). ATAC-seq peaks in the human and mouse  $\beta$ -like globin loci. A)** Human ATAC-seq peaks in the extended human  $\beta$ -like globin locus (chr11:5189001-5329000, hg38 reversed) are indicated. Regions in which the underlying DNA sequence and ATAC-seq signals are conserved in the orthologous mouse locus are red. Regions with DNA sequence conservation but no ATAC-seq peaks in mice are blue. Regions with no DNA sequence conservation or ATAC-seq peaks in mice are black. Blue or red ATAC-seq peaks are labeled A to Q. Regions of *HBG1* and *HBB* present in the Townes mouse are outlined by transparent blue and green rectangles. **B)** The mouse extended  $\beta$ -like globin locus (mchr7:103783001-103903000, mm10 reversed) showing ATAC-seq signals across regions with sequence similarity to human DNA regions A to Q shown in panel A.

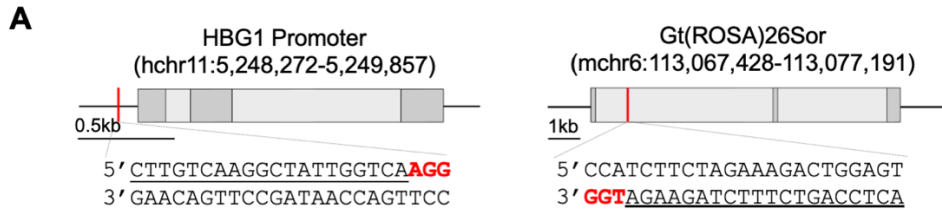

**B HBG Indel Profile - Berkeley**

| Indel                                                      | Frequency      |
|------------------------------------------------------------|----------------|
| <u>GGCCAGCCTTGCTTGACCAATAGCCTTGACAAGGCAAACCTTGACCAATAG</u> |                |
| GGCCAGCCTTGCCCTTGA-----CAAGGCAAACCTTGACCAATAG              | -13 31.9       |
| GGCCAGCCTTGCCCTTGACCAATAGCCTTGACAAGGCAAACCTTGACCAATAG      | 0 23.4         |
| GGCCAGCCTTGCCCTTGA---ATAGCCTTGACAAGGCAAACCTTGACCAATAG      | -3 6.4         |
| GGCCAGCCTTGCCCTTGA--AATAGCCTTGACAAGGCAAACCTTGACCAATAG      | -2 6.1         |
| GGCCAGCCTTGCCCTTGAC-AATAGCCTTGACAAGGCAAACCTTGACCAATAG      | -1 5.2         |
| GGCCAGCCTTGCCCTTGA---TAGCCTTGACAAGGCAAACCTTGACCAATAG       | -4 3.9         |
| GGCCAGCCTTGCCCTTGAC-----TTGACAAGGCAAACCTTGACCAATAG         | -8 3.0         |
| GGCCAGCCTTG-----ACAAAGGCAAACCTTGACCAATAG                   | -18 <u>2.4</u> |
|                                                            | <u>76.6</u>    |

**C Rosa26 Indel Profile - Berkeley**

| Indel                                                             | Frequency      |
|-------------------------------------------------------------------|----------------|
| <u>GATCTGCAACTCCAGTCTTTCTAGAAGATGGGCGGGAGTCTTCTGGGCAGGCTTAAAG</u> |                |
| GATCTGCAACTCCAGTCTTTCTAGA-GATGGGCGGGAGTCTTCTGGGCAGGCTTAAAG        | -1 19.5        |
| GATCTGCAACTCCAGTCTTTCTAGA---TGGGCGGGAGTCTTCTGGGCAGGCTTAAAG        | -3 17.4        |
| GATCTGCAACTCCAGTCTT-----CTGGGCAGGCTTAAAG                          | -23 15.6       |
| GATCTGCAACTCCAGTCTTTCTAGAAGATGGGCGGGAGTCTTCTGGGCAGGCTTAAAG        | 0 6.1          |
| GATCTGCAACTCCAGTCTTTCT-----GGGCAGGCTTAAAG                         | -22 3.5        |
| GATCTG-----GGCAGGCTTAAAG                                          | -39 3.3        |
| GATCTGCAACT-----GGGCGGGAGTCTTCTGGGCAGGCTTAAAG                     | -19 <u>3.0</u> |
|                                                                   | <u>93.9</u>    |

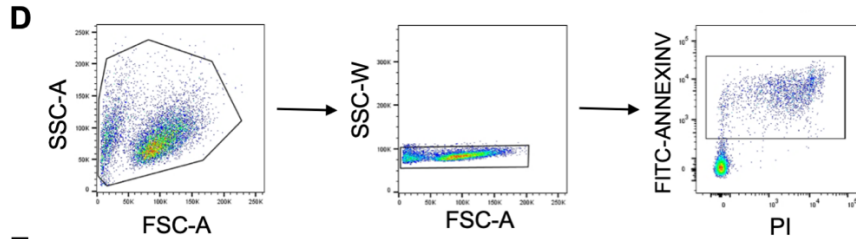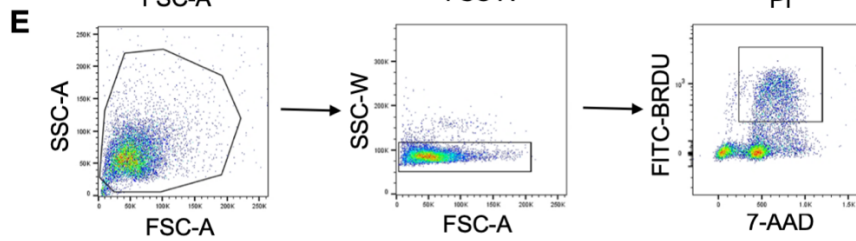

**F HBG Indel Profile - Townes**

| Indel                                                      | Frequency     |
|------------------------------------------------------------|---------------|
| <u>GGCCAGCCTTGCTTGACCAATAGCCTTGACAAGGCAAACCTTGACCAATAG</u> |               |
| GGCCAGCCTTGCCCTTGAC-----AAGGCAAACCTTGACCAATAG              | -13 27.7      |
| GGCCAGCCTTGCCCTTGACCAATAGCCTTGACAAGGCAAACCTTGACCAATAG      | 0 22.0        |
| GGCCAGCCTTGCCCTTGA-CAATAGCCTTGACAAGGCAAACCTTGACCAATAG      | -1 8.7        |
| GGCCAGCCTTG-----ACAAAGGCAAACCTTGACCAATAG                   | -18 5.2       |
| GGCCAGCCTTGCCCTTGA---ATAGCCTTGACAAGGCAAACCTTGACCAATAG      | -3 4.2        |
| GGCCAGCCTTGCCCTTGA--AATAGCCTTGACAAGGCAAACCTTGACCAATAG      | -2 3.1        |
| GGCCAGCCTTGC-----CAATAGCCTTGACAAGGCAAACCTTGACCAATAG        | -6 2.8        |
| GGCCAGCCTTGCCCTTGA---TAGCCTTGACAAGGCAAACCTTGACCAATAG       | -4 <u>2.4</u> |
|                                                            | <u>76.1</u>   |

**Fig. S5 (related to Figure 3) Cas9 editing of the  $\gamma$ -globin genes in Berkeley or Townes mice.** Lineage negative (Lin<sup>-</sup>) cells from bone marrow were edited by electroporation with Cas9-sgRNA ribonucleoprotein (RNP), followed by incubation in StemSpan SFEM supplemented with mouse stem cell factor (mSCF, 100 ng/ml), mouse interleukin 3 (mIL-3, 10 ng/ml), mouse interleukin 11 (mIL-11, 100 ng/ml), human FLT3 ligand (hFLT3 ligand, 100 ng/ml) and penicillin-streptomycin (PenStrep, 1X). **(A)** Sequences of single guide RNAs (sgRNAs) targeting the *HBG* promoter BCL11A binding site or *Rosa26* intron 1; PAM sequences are indicated in red. **(B,C)** High-frequency (>2%) insertion-deletion (indel) mutations detected by NGS at 72 hours after editing Lin<sup>-</sup> bone marrow cells from Berkeley mice. **(D)** Gating strategy for Annexin V flow cytometry to assess apoptosis after editing. **(E)** Gating strategy for flow cytometry to measure BrdU uptake after editing. **(F)** Indel profiles at the *HBG* promoter at 72 hours after editing Lin<sup>-</sup> bone marrow cells from Townes mice.

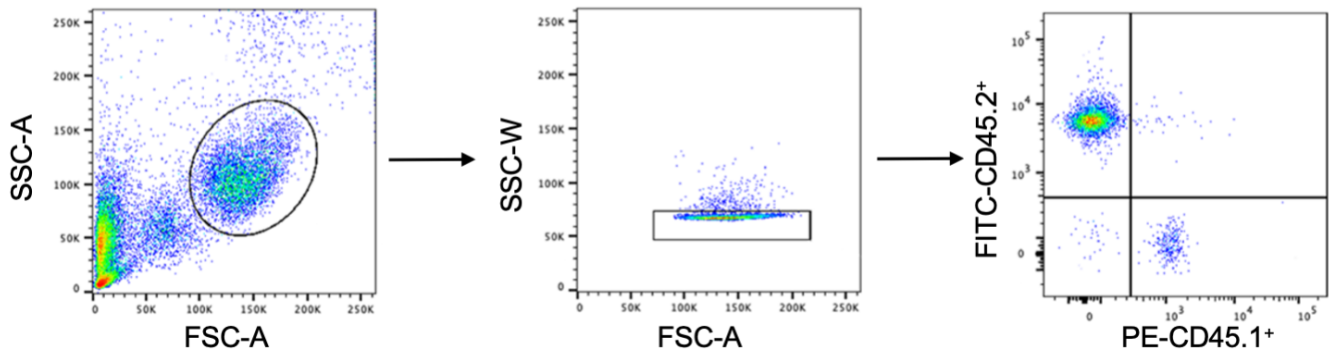

**Fig. S6 (related to Figure 5). Engraftment of donor cells after mouse-to-mouse hematopoietic stem cell transplantation (HSCT).** Flow cytometry gating strategy to quantify the fraction of circulating donor-derived CD45.2<sup>+</sup> mononuclear cells following HSCT in lethally irradiated CD45.1 recipient mice. Engraftment is calculated as  $\%CD45.2/(\%CD45.1+\%CD45.2)$ .

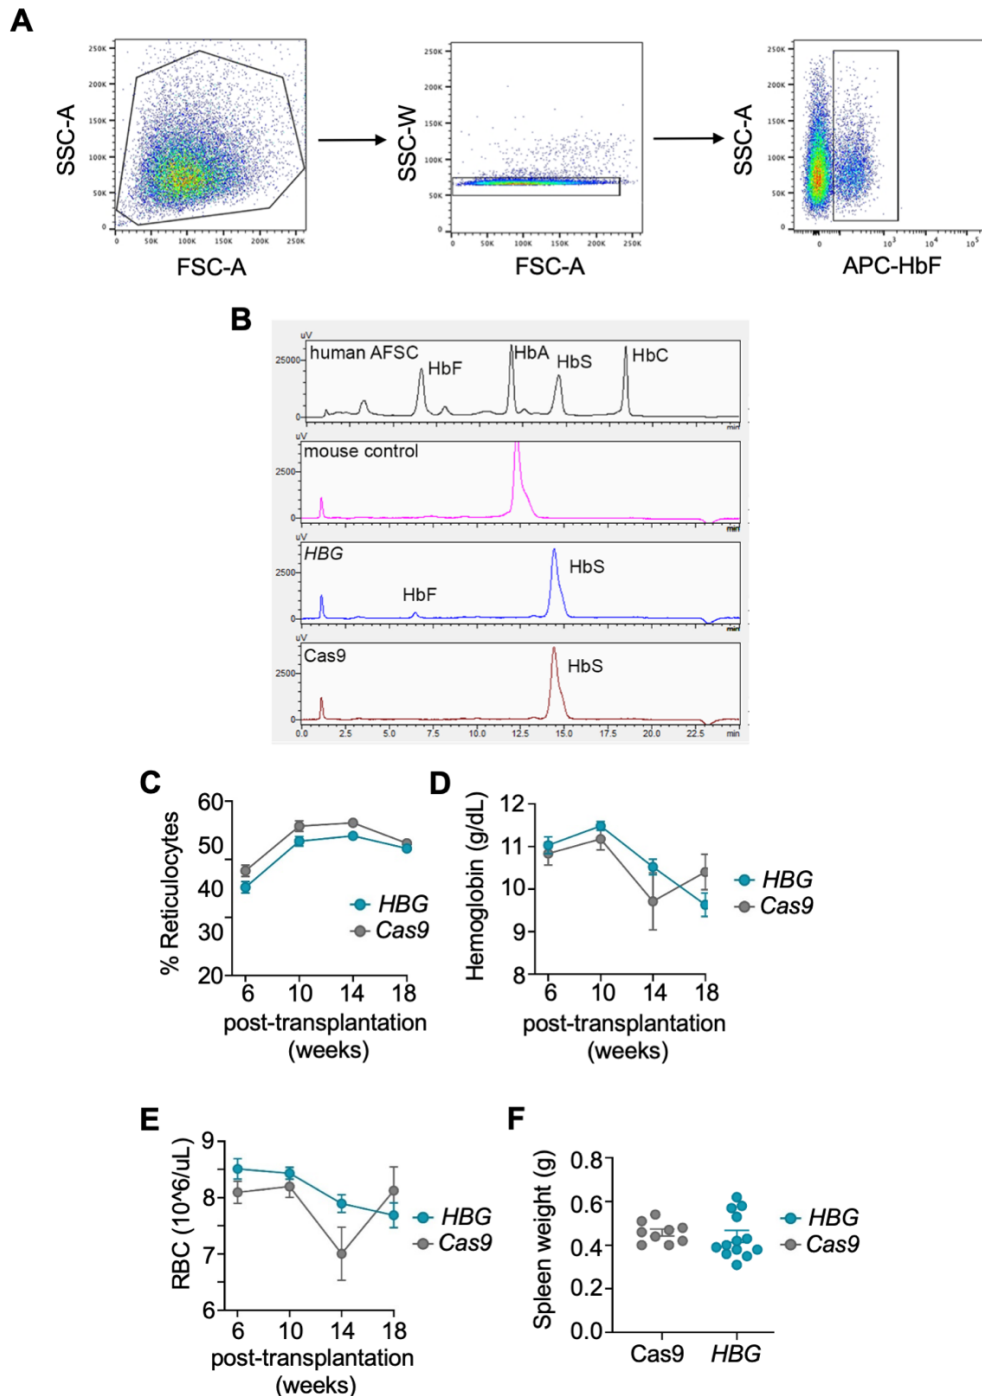



**Fig. S7 (related to Figure 6). Cas9-mediated disruption of the  $\gamma$ -globin promoter BCL11A binding site in Townes mouse HSCs induces sub-physiological levels of HbF and fails to correct SCD phenotypes.** Lin<sup>-</sup> bone marrow HSPCs from Townes SCD mice were electroporated with RNP targeting the human *HBG1* promoter or Cas9 alone, transferred into lethally irradiated C57BL/6 hosts, and analyzed serially, beginning at six weeks post-HSCT. **(A)** Gating strategy for flow cytometry determination of fetal hemoglobin (HbF)-immunostaining RBCs ("F-cells). **(B)** Representative ion exchange high performance liquid chromatography profile from hemolysate at 14 weeks post-HSCT. **(C)** Percentage of reticulocytes versus time after HSCT. **(D)** Blood hemoglobin levels (g/dL) versus time after HSCT. **(E)** Peripheral blood RBC counts versus time after HSCT. **(F)** Spleen weights at necropsy performed at 18 weeks. Graphs in panels C-F show the mean  $\pm$  SD of 2 biological replicate experiments consisting of 13 RNP-edited mice and 9 Cas9 mice total. No significant differences were observed between the two groups analyzed in panels C-F (t-test).

**Table S1. PCR primer pairs used in this study**

| Gene or Locus | Species | Model    | Application | Primer Seq 5' to 3'          | Size (bp) |
|---------------|---------|----------|-------------|------------------------------|-----------|
| Hbb-b1.F      | Mouse   | Berkeley | Genotyping  | AAAGGTGAACTCCGATGAAGTTGG     | 442       |
| Hbb-b1.R      |         |          |             | ATAGGAAGGTTGAGCAGAATAGCC     |           |
| HBB.F         | Human   | Berkeley | Genotyping  | ACATTTGCTTCTGCACACAACGTG     | 284       |
| HBB.R         |         |          |             | ACCACCAGCAGCCTAAGG           |           |
| Common        | Mouse   | Townes   | Genotyping  | TTGAGCAATGTGGACAGAGAAGG      | --        |
| Human WT      | Human   | Townes   | Genotyping  | GTTTAGCCAGGGACCGTTTCAG       | 320       |
| Human SCD     | Human   | Townes   | Genotyping  | AATTCTGGCTTATCGGAGGCAAG      | 250       |
| Mouse WT      | Mouse   | Townes   | Genotyping  | ATGTCAGAAGCAAATGTGAGGAGCA    | 432       |
| MinION.F      | Human   | Townes   | MinION seq  | TTTGGCTCCAGGCACATTCCCACATCA  | ~18.5kb   |
|               |         |          |             | AGATAAAGAGAAAC               | mWT       |
| MinION.R      |         |          |             | AGTGGGTTGCATGGGTTTCCTTACACAC |           |
|               |         |          |             | TTTGCA                       |           |
| HBA1.1.F      | Human   | Berkeley | TLA seq     | GCTCTGCCCAGGTTAAGG           | 242       |
| HBA1.1.R      |         |          |             | GTTGGTCTTGTCGGCAGG           |           |
| HBA1.2.F      | Human   | Berkeley | TLA seq     | CCAAATACCGTTAAGCTGGA         | 265       |
| HBA1.2.R      |         |          |             | CTTGAAGTTGACCGGGTC           |           |
| HBBandHBG.1.F | Human   | Berkeley | TLA seq     | TATCAGAATGGCCCTAGTCT         | 751       |
| HBBandHBG.1.R |         |          |             | ACTTCCGCAGAACACTTTAT         |           |
| HBBandHBG.2.F | Human   | Berkeley | TLA seq     | TTGTCTAAGTTGCCTCGAGA         | 575       |
| HBBandHBG.2.R |         |          |             | CGTCTCAGCCTACAACATAC         |           |
| MiniLCR.1.F   | Human   | Berkeley | TLA seq     | CTCAGCCACCCTAATAGC           | 75        |
| MiniLCR.1.R   |         |          |             | GGACAGAGCACATTATAATTAAC      |           |
| MiniLCR.2.F   | Human   | Berkeley | TLA seq     | TGTCTATATGGGTCGTTGTG         | 130       |
| MiniLCR.2.R   |         |          |             | AAAGACAAGCACGTGGAC           |           |
| HBGprom.DS.F  | Human   | Both     | NGS         | ACTGAATCGGAACAAGGCAAAGGCT    | 268       |
| HBGprom.DS.R  |         |          |             | ACCCATGGCGTCTGGACTAGGAGCT    |           |
| mROSA26.DS.F  | Mouse   | Both     | NGS         | TTCTGGGAGTTCTCTGCTGC         | 344       |
| mROSA26.DS.R  |         |          |             | TGGAAAATACTCCGAGGCGG         |           |
| mCdkn1a.F     | Mouse   | Both     | qPCR        | AGCCTGACAGATTTCTATCACTCC     | 24        |
| mCdkn1a.R     |         |          |             | TGGGCACTTCAGGGTTTTCT         |           |
| mGAPDH.F      | Mouse   | Both     | qPCR        | GTGTTCCCTACCCCAATGTG         | 110       |
| mGAPDH.R      |         |          |             | AGGAGACAACCTGGTCCTCA         |           |

**Table S2. Bacterial artificial chromosome (BAC) probes used for fluorescent in situ hybridization**

| BAC Probe   | Species | Model    | Target              | Location                  | Coordinates                            |
|-------------|---------|----------|---------------------|---------------------------|----------------------------------------|
| RP23-308J23 | Mouse   | Berkeley | TIS                 | Centromeric to 1A5        | mchr1:26,106,021-26,275,300            |
| RP24-347O20 |         |          |                     | Telomeric to 1A5          | mchr1:26.305.166-26,440,332            |
| RP23-25C20  | Mouse   | Townes   | Knock-In            | Centromeric to 7E5        | mchr7:103,573,095-103,768,675          |
| RP23-367M2  |         |          |                     | Telomeric to 7E5          | mchr7:103,894,127-104,083,626          |
| RP23-239C8  | Mouse   | Both     | <i>Rosa26</i> locus | Centromeric to 6E3        | mchr6:112,778,187-113,016,809          |
| RP23-33G8   |         |          |                     | Telomeric to 6E3          | mchr6:113,106,213-113,297,830          |
| RP23-223M9  | Mouse   | Both     | <i>MYBL1</i> locus  | mchr1 control probe       | mchr1: 9,641,212-9,819,361<br>(GRCm39) |
| RP11-622D14 | Human   | Both     | <i>HBB</i> locus    | Complete <i>HBB</i> locus | chr11:5,218,918-5,406,749 hg19         |

**Table S3. Transgene copy numbers determined by droplet digital PCR. SD, standard deviation**

| Target   | Mean Copy Number | SD    | n |
|----------|------------------|-------|---|
| HBA1     | 9.262            | 0.268 | 6 |
| HBB      | 21.685           | 1.477 | 6 |
| HBG2     | 26.590           | 0.302 | 6 |
| Mini-LCR | 3.942            | 0.092 | 6 |
